# Supplementary material
Source: publisher figshare collection journal article supplement (https://asha.figshare.com/articles/dataset/_/6987371)
Supplement: Supplementary file 1 [file 1]

**Supplemental Material S2.** Comparison between Read, Understand, Learn, & Excel (RULE) measures and Learning and Study Strategies Inventory (LASSI; Weinstein, Palmer, & Acee, 2016) Information processing scale.

| RULE                 | LASSI Information Processing Scale |          |           |
|----------------------|------------------------------------|----------|-----------|
|                      | <i>n</i>                           | <i>M</i> | <i>SD</i> |
| High RULE performers | 2                                  | 55.00    | 14.14     |
| Low RULE performers  | 1                                  | 5.00     | 0.00      |

*Note.* High RULE performers refer to individuals that scored at or below the 75th percentile on SVT tests and CIU rates. Low RULE performers refer to those who scored at or above the 25th percentile on SVT tests and CIU rates.

**Reference**

Weinstein, C. E., Palmer, D. R., & Acee, T. W. (2016). *LASSI user's manual: Learning and study strategies* (3rd ed.). Clearwater, FL: H&H.
