# Supplementary material
Source: publisher figshare collection journal article supplement (https://asha.figshare.com/articles/dataset/_/6987371)
Supplement: Supplementary file 2 [file 1]

**Supplemental Material S1.** Comparison between Read, Understand, Learn, & Excel (RULE) measures and alternative measures of reading comprehension.

| Alternative measures                    | RULE: Public Speaking |                 | RULE: Social Psychology |                 |
|-----------------------------------------|-----------------------|-----------------|-------------------------|-----------------|
|                                         | Immediate CIUrate     | Delayed CIUrate | Immediate CIUrate       | Delayed CIUrate |
| Demographics questionnaire <sup>a</sup> |                       |                 |                         |                 |
| High recall ( $n = 8$ )                 | 77.04 (27.36)         | 68.10 (47.37)   | 73.23 (27.36)           | 75.61 (41.50)   |
| Low recall ( $n = 14$ )                 | 64.45 (24.65)         | 52.20 (32.39)   | 63.95 (18.95)           | 53.58 (27.00)   |
| GPA <sup>b</sup>                        |                       |                 |                         |                 |
| High GPA ( $n = 5$ )                    | 101.26 (37.95)        | 98.67 (52.22)   | 89.36 (12.83)           | 91.06 (38.58)   |
| Low GPA ( $n = 5$ )                     | 74.51 (12.96)         | 56.84 (12.07)   | 75.82 (26.27)           | 64.72 (39.36)   |

*Note.* Values in parentheses within the body of the table are standard deviations. CIU = correct information unit; GPA = grade point average.

<sup>a</sup>High recall group comprises individuals that responded with either “not at all typical of me” or “not very typical to me” to both items targeting recall of information (“I forget information I have just read,” “I forget information after a delay”). Low recall group comprises individuals that responded with “somewhat typical of me,” “fairly typical of me,” or “very much typical of me” to both items. <sup>b</sup>GPA was reported only by 22 individuals. The high GPA group consists of individuals that scored either at the 25th percentile or lower ( $GPA \leq 3.32$ ). Low GPA consists of individuals that scored either at the 75th percentile or higher ( $GPA \geq 3.70$ ).
